# Supplementary material
Source: PubMed Central journal article supplement (PMC3166630)

Neuron, Volume 71

## **Supplemental Information**

### ***Rich* Regulates Target Specificity of Photoreceptor Cells and N-Cadherin Trafficking in the *Drosophila* Visual System via Rab6**

Chao Tong, Tomoko Ohyama, An-Chi Tien, Akhila Rajan, Claire M. Haueter, and Hugo J. Bellen

#### **Inventory of Supplemental Information**

The Supplemental Information includes detailed Experimental Procedures, 8 figures (S1-S8), and Figure legends. Figure S1 is related to Figure 1. Figure S2 is related to Figure 2. Figure S3 is related to Figure 4. Figure S4 is related to Figure 5. Figure S5 is related to Figure 7. Figures S6-S8 are related to Figure 8.

## Supplemental Materials

### Supplemental Experimental Procedures

#### Genetics

We generated 4 small deletions using FLPase and FRT-bearing *P*-elements or *PiggyBac* insertions as described before (Parks et al., 2004; Thibault et al., 2004). The following insertions were used: *p[XP]d10386* and *PBac[WH]f01638* (to generate a deletion from 79E3 to 79E6); *p[XP]CG11426 [d05846]* and *PBac[RB]e01384* (to generate a deletion from 79E4 to 80A1'); *p[XP]CG11367 [d05379]* and *PBac[RB] e01384* (to generate a deletion from 80A1 to 80A1'); *p[XP]CG11367 [d05379]* and *PBac[RB] e02858* (to generate a deletion from 80A1 to 80B1).

To generate eye clones, we crossed *y w eyFLP GMR-lacZ; FRT80B ubiGFP, cl / TM3* flies to following stocks 1) *y w; FRT80B iso*; 2) *y w; FRT80B rich<sup>1</sup> / TM3, Kr-GFP*; or 3) *y w; FRT80B rich<sup>2</sup> / TM3, Kr-GFP*. We also crossed *y w eyFLP GMR-lacZ; FRT40A ubiGFP* flies to *y w; FRT40 CadN<sup>Δ14</sup> / CyO* flies. *y w eyFLP; FRT40A cl w<sup>+</sup> / CyO, Kr-GFP* flies was also crossed to the following stocks *y w; FRT40A Rab6<sup>D23D</sup> / CyO* (Coutelis and Ephrussi, 2007); 2) *y w; FRT40A Liprin α<sup>e</sup> / CyO* (Choe et al., 2006); or 3) *FRT40A iso*.

To label R7 cells in *rich* mutant eyes, *y w eyFLP GMR-lacZ; Pan-R7 Gal4 / CyO; FRT80B cl / TM6B* flies were crossed to the following stocks 1) *y w; UAS-SytGFP; FRT80B rich<sup>1</sup> / TM6B*; 2) *y w; UAS-SytGFP; FRT80B rich<sup>2</sup> / TM6B*; 3) *y w; UAS-SytGFP; FRT80B iso* (control); 4) *y w UAS-SytGFP; FRT40A Rab6<sup>D23D</sup> / CyO; FRT80B rich<sup>1</sup> / TM6B*; 5) *y w UAS-SytGFP; FRT40A Rab6<sup>D23D</sup> / CyO; FRT80B rich<sup>2</sup> / TM6B*; 6) *y w UAS-SytGFP; FRT40A N-Cad<sup>405</sup> / CyO; FRT80B rich<sup>1</sup> / TM6B*; or 7) *y w UAS-SytGFP; FRT40A N-Cad<sup>405</sup> / CyO; FRT80B rich<sup>2</sup> / TM6B*. To label R7 cells in *Rab6* mutant eyes, *y w eyFLP GMR-lacZ; FRT40A w<sup>+</sup> cl / CyO; PanR7 Gal4 / TM6B* flies were crossed to 1) *y w; Rab6<sup>D23D</sup> FRT40A / CyO; UAS-SytGFP* or 2) *y w; FRT40A iso; UAS-SytGFP* (control). To label R8 cells in *rich* mutant eyes, *y w eyFLP GMR-lacZ; Rh6 GFP / CyO; FRT80B cl / TM6B* flies were crossed to 1) *y w; UAS-SytGFP; FRT80B rich<sup>1</sup> / TM6B*; 2) *y w; UAS-SytGFP; FRT80B iso* (control). To label R4 cells at the 3<sup>rd</sup> instar larvae stage, we crossed *y w eyFLP GMR-lacZ; FRT80B cl / TM6B* flies to 1) *y w; mΔGFP / CyO; FRT80B rich<sup>1</sup> / TM6B* or 2) *y w; mΔGFP / CyO; FRT80B iso* (control) flies. To label R7

cells at the 3<sup>rd</sup> instar larvae stage; we crossed *y w eyFLP GMR-lacZ; 181Gal4 / CyO; FRT80B cl / TM6B* flies to 1) *y w; UAS-SytGFP; FRT80B rich<sup>1</sup> / TM6B* or 2) *y w; UAS-SytGFP; FRT80B iso* (control). To label R2-R5 axons, we crossed *y w eyFLP; Ro-τ-lacZ FRT80B cl / TM6B* flies to 1) *y w; FRT80B rich<sup>1</sup> / TM3, Kr-GFP* or 2) *y w; FRT80B iso* (control). To label the R1-R6 cells at the adult stage, we crosses *y w eyFLP; Rh1Gal4 / CyO; FRT80B cl / TM6B* flies to 1) *y w; UAS-SytGFP; FRT80B rich<sup>1</sup> / TM6B* or *y w; UAS-SytGFP; FRT80B iso* (control).

To test whether the genomic fragment containing only *rich* can rescue *rich* mutants, *y w; rich-gRE::VK37 / CyO; FRT80B rich<sup>1</sup> / TM3* flies were crossed to *y w; FRT80B rich<sup>1</sup> / TM3, Kr-GFP* and the flies without TM3 were scored. The HA tagged genomic fragment (HA-Rich-gRE) rescued flies were kept as a stock: *HA-Rich-gRE::VK37; FRT80B rich<sup>1</sup>*.

To test the genetic interaction between *rich*, *DLAR*, *liprin α*, and *jeb*, the flies with following genotypes were generated: 1) *y w eyFLP; FRT80B rich<sup>1</sup> / FRT80B cl UbiGFP*; 2) *y w eyFLP; FRT80B rich<sup>2</sup> / FRT80B cl UbiGFP*; 3) *y w eyFLP; FRT40A DLAR / +; FRT80B rich<sup>1</sup> / FRT80B cl UbiGFP*; 4) *y w eyFLP; FRT40A DLAR / +; FRT80B rich<sup>2</sup> / FRT80B cl UbiGFP*; 5) *y w eyFLP; FRT40A Liprin α<sup>e</sup> / +; FRT80B rich<sup>1</sup> / FRT80B cl UbiGFP*; 6) *y w eyFLP; FRT40A Liprin α<sup>e</sup> / +; FRT80B rich<sup>2</sup> / FRT80B cl UbiGFP*; 7) *y w eyFLP; FRT40A Jeb / +; FRT80B rich<sup>1</sup> / FRT80B cl UbiGFP*; 8) *y w eyFLP; FRT40A Jeb / +; FRT80B rich<sup>2</sup> / FRT80B cl UbiGFP*.

To generate *CadN*, *rich* double mutant animals, the genomic rescue allele *rich-gRE* was recombined on the *FRT40A* chromosome. *y w; FRT40A rich-gRE::VK37 / CyO; 3L6 deletion / TM3* flies were crossed to *y w eyFLP; FRT40A CadN<sup>A14</sup> / CyO; FRT80B rich<sup>1</sup> / TM6B*.

Eye MARCM analysis: We used the MARCM technique (Lee and Luo, 1999) to study *rich*'s role in the R cells. To label mutant clones only in R cells, the flies with the following genotypes were generated: 1) *y w ey3.5FLP; Act>Gal4 UAS-SytGFP / UAS-SytGFP; FRT80B rich<sup>1</sup> / FRT80B tub-Gal80, M(3)*; 2) *y w ey3.5FLP; Act>Gal4 UAS-SytGFP / UAS-SytGFP; FRT80B iso / FRT80B tub-Gal80, M(3)* (control). To label mutant clones only in R7 cells, we generated the flies with following genotypes: 1) *y w GMRFLP; GMR-Gal4 / UAS-SytGFP; FRT80B rich<sup>1</sup> / FRT80B tub-Gal80, M(3)*; 2) *y w GMRFLP; GMR-Gal4 / UAS-SytGFP; FRT80B iso / FRT80B tub-Gal80, M(3)*. To reduce

nonspecific labeling of R7 cells, the flies were kept at 18°C before dissection. To express the mutant Rab6 proteins in *rich* mutant cells, we generated the flies with the following genotypes: 1). *y w eyFLP / UAS-YFPRab6 Q71L; Act>Gal4 UAS-SytGFP / CyO; FRT80B rich<sup>1</sup> / FRT80B tub-Gal80, M(3)*; 2) *y w eyFLP; Act>Gal4 UAS-SytGFP / UAS-YFPRab6 T26N; FRT80B rich<sup>1</sup> / FRT80B tub-Gal80, M(3)*; 3) *y w eyFLP; Act>Gal4 UAS-SytGFP / UAS-SytGFP; FRT80B rich<sup>1</sup> / FRT80B tub-Gal80, M(3)*; 4) *y w eyFLP; Act>Gal4 UAS-SytGFP / UAS-SytGFP; FRT80B iso / FRT80B tub-Gal80, M(3)* (control). To overexpress CadN in the *rich* mutant cells, we generated flies with the following genotype : *y w eyFLP; Act>Gal4 UAS-SytGFP / UAS-CadN; FRT80B M (3), tubGal80 / FRT 80B rich<sup>1</sup>*. To generated mutant clones in ORNs, We generated flies with following genotypes: 1) *y w eyFLP; UAS-SytGFP / Or22a Gal4; FRT80B iso / FRT80B tub-Gal80, M(3)* (control); 2) *y w eyFLP; UAS-SytGFP / Or22a Gal4; FRT80B rich<sup>1</sup> / FRT80b tub-Gal80, M(3)*; 3) *y w eyFLP; FRT40A Rab6<sup>D23D</sup> / FRT40A tub-Gal80; UAS-SytGFP / Or22a Gal4*; 4) *y w eyFLP; UAS-SytGFP / Or46a Gal4; FRT80B iso / FRT80B tub-Gal80, M(3)* (control); 5) *y w eyFLP; UAS-SytGFP / Or46a Gal4; FRT80B rich<sup>1</sup> / FRT80B tub-Gal80, M(3)*; 6) *y w eyFLP; FRT40A Rab6<sup>D23D</sup> / FRT40A tub-Gal80; UAS-SytGFP / Or46a Gal4*; 7) *y w eyFLP; UAS-SytGFP / Or47b Gal4; FRT80B iso / FRT80B tub-Gal80, M(3)* (control); 8) *y w eyFLP; UAS-SytGFP / Or47b Gal4; FRT80B rich<sup>1</sup> / FRT80B tub-Gal80, M(3)*; 9) *y w eyFLP; FRT40A Rab6<sup>D23D</sup> / FRT40A tub-Gal80; UAS-SytGFP / Or47b Gal4*; 10) *y w eyFLP; FRT40A CadN<sup>M19</sup> / FRT40A tub-Gal80; Or22a Gal4, UAS-SytGFP*; 11) *y w eyFLP; FRT40A CadN<sup>M19</sup> / FRT40A tub-Gal80; Or46a Gal4, UAS-SytGFP*; 12) *y w eyFLP; FRT40A CadN<sup>M19</sup> / FRT40A tub-Gal80; Or47b Gal4, UAS-SytGFP*

### **Immunohistochemistry**

Antibody dilution used: mAb24B10 1:50 (DHSB) (Zipursky et al., 1984); guinea pig anti-Senseless (1:1000) (Nolo et al., 2000); rat anti-Elav (1:25, DHSB)(O'Neill et al., 1994); chicken anti-GFP (Abcam) (1:1000); mouse anti-HA.11 (16B12) (1:500) (Covance); rabbit anti-Hrp (1:1000) (Jackson ImmunoResearch Laboratories); mouse anti-Nc82 (1:10) (DHSB) (Wagh et al., 2006); mouse anti-V5 (1:1000) (Invitrogen); rabbit anti-beta-GAL (1:500) (Cappel); rabbit anti-dGM130 (1:200) (Yano et al., 2005);

mouse anti-120KD protein (1:200) (Calbiochem); rabbit anti-dSYX16 (1:500) (Xu et al., 2002); rat anti-N-Cadherin 1:50 (DHSB) (Iwai et al., 1997); mouse anti-DLAR 1:10 (DHSB) (Sun et al., 2000); mouse anti-PTP69D (1:10) (DHSB) (Desai et al., 1994); rabbit anti-Caps (1:200) (Shinza-Kameda et al., 2006); Guinea pig anti-Jeb (1:5000) (Englund et al., 2003) Pre-absorbed secondary antibodies conjugated to FITC, Cy3, Cy5 (Jackson ImmunoResearch Laboratories) were used at 1:500.

### **GEF assay**

GST fusion proteins dRab6 and Rac1 (a positive control) were made and purified from *E. coli* as described in the manufacturer's manual. The GST tag was removed by digesting with biotin labeled Thrombin followed by streptavidin beads and Glutathione beads absorption. To load GDP to the small GTPases, 1  $\mu$ M dRab6 or Rac1 in 110 mM NaCl, 50 mM Tris-HCl pH8.0, 1 mM EDTA, 0.8 mM DTT, 0.005% Triton X-100 was incubated with 50  $\mu$ M BODIPY-GDP for 60 min at 30°C. The reactions were stopped by adding MgCl<sub>2</sub>. S2 cells were transfected with pAcRich alone or together with pAc CG1116-PB, pAcyRgp1p. HEK293T cells were transfected with pCMV Tiam1. Cell lysates were made by sonicating transfected cells in 110 mM NaCl, 50 mM Tris-HCl pH8.0, 12 mM MgCl<sub>2</sub>, 0.8 mM DTT. 0.1  $\mu$ M BODIPY-GDP loaded dRab6 was incubated with cell lysates with or without Rich, Rich+CG1116-PB, Rich+yRgp1p overexpression in presence of 2 mM GDP. As a positive control, BODIPY-GDP loaded Rac1 was incubated with cell lysates with or without Tiam1 overexpression. The fluorescence intensity was read automatically by plate reader every 2 mins for 50 mins.

### **RNA isolation and real-time PCR**

Total RNA was isolated from 40 adult heads with largest mutant clones (Based on white patches) using Absolutely RNA miniprep Kit (Stratagene). Reverse transcription was done using the SuperScript One-Step RT-PCR system with Platinum Taq kit (Invitrogen). The real-time PCR was performed as described before (Fan et al., 2009). Relative levels of mRNAs were calculated using Rotor-Gene 6.0 software and normalized to the levels of endogenous tubulin in the same samples. The relative transcript level of the control was set as 1. The relative transcript levels of other samples were compared to the control,

and the fold-changes shown in the graph. For each experiment, qPCR reactions were done in triplicate. The primers used are: CadN Forward: AGGAGCGACTTTCAATCGTGGG; CadN Reverse: GACGTGGGTCCGATGTTGAAGG; Tubulin Forward: GTGAATTTTCCTTGTCGCGTG; Tubulin Reverse: CTCCAGTCTCGCTGAAGAAG.

## Supplemental References

- Choe, K.M., Prakash, S., Bright, A., and Clandinin, T.R. (2006). Liprin-alpha is required for photoreceptor target selection in *Drosophila*. *Proc Natl Acad Sci U S A* *103*, 11601-11606.
- Coutelis, J.B., and Ephrussi, A. (2007). Rab6 mediates membrane organization and determinant localization during *Drosophila* oogenesis. *Development (Cambridge, England)* *134*, 1419-1430.
- Desai, C.J., Popova, E., and Zinn, K. (1994). A *Drosophila* receptor tyrosine phosphatase expressed in the embryonic CNS and larval optic lobes is a member of the set of proteins bearing the "HRP" carbohydrate epitope. *J Neurosci* *14*, 7272-7283.
- Englund, C., Loren, C.E., Grabbe, C., Varshney, G.K., Deleuil, F., Hallberg, B., and Palmer, R.H. (2003). Jeb signals through the Alk receptor tyrosine kinase to drive visceral muscle fusion. *Nature* *425*, 512-516.
- Fan, H.Y., Liu, Z., Shimada, M., Sterneck, E., Johnson, P.F., Hedrick, S.M., and Richards, J.S. (2009). MAPK3/1 (ERK1/2) in ovarian granulosa cells are essential for female fertility. *Science (New York, NY)* *324*, 938-941.
- Iwai, Y., Usui, T., Hirano, S., Steward, R., Takeichi, M., and Uemura, T. (1997). Axon patterning requires DN-cadherin, a novel neuronal adhesion receptor, in the *Drosophila* embryonic CNS. *Neuron* *19*, 77-89.
- Lee, T., and Luo, L. (1999). Mosaic analysis with a repressible cell marker for studies of gene function in neuronal morphogenesis. *Neuron* *22*, 451-461.
- Nolo, R., Abbott, L.A., and Bellen, H.J. (2000). Senseless, a Zn finger transcription factor, is necessary and sufficient for sensory organ development in *Drosophila*. *Cell* *102*, 349-362.
- O'Neill, E.M., Rebay, I., Tjian, R., and Rubin, G.M. (1994). The activities of two Ets-related transcription factors required for *Drosophila* eye development are modulated by the Ras/MAPK pathway. *Cell* *78*, 137-147.
- Parks, A.L., Cook, K.R., Belvin, M., Dompe, N.A., Fawcett, R., Huppert, K., Tan, L.R., Winter, C.G., Bogart, K.P., Deal, J.E., *et al.* (2004). Systematic generation of high-resolution deletion coverage of the *Drosophila melanogaster* genome. *Nat Genet* *36*, 288-292.
- Shinza-Kameda, M., Takasu, E., Sakurai, K., Hayashi, S., and Nose, A. (2006). Regulation of layer-specific targeting by reciprocal expression of a cell adhesion molecule, capricious. *Neuron* *49*, 205-213.
- Sun, Q., Bahri, S., Schmid, A., Chia, W., and Zinn, K. (2000). Receptor tyrosine phosphatases regulate axon guidance across the midline of the *Drosophila* embryo. *Development (Cambridge, England)* *127*, 801-812.
- Thibault, S.T., Singer, M.A., Miyazaki, W.Y., Milash, B., Dompe, N.A., Singh, C.M., Buchholz, R., Demsky, M., Fawcett, R., Francis-Lang, H.L., *et al.* (2004). A complementary transposon tool kit for *Drosophila melanogaster* using P and piggyBac. *Nat Genet* *36*, 283-287.
- Wagh, D.A., Rasse, T.M., Asan, E., Hofbauer, A., Schwenkert, I., Durrbeck, H., Buchner, S., Dabauvalle, M.C., Schmidt, M., Qin, G., *et al.* (2006). Bruchpilot, a protein with homology to ELKS/CAST, is required for structural integrity and function of synaptic active zones in *Drosophila*. *Neuron* *49*, 833-844.
- Xu, H., Boulianne, G.L., and Trimble, W.S. (2002). *Drosophila* syntaxin 16 is a Q-SNARE implicated in Golgi dynamics. *J Cell Sci* *115*, 4447-4455.
- Yano, H., Yamamoto-Hino, M., Abe, M., Kuwahara, R., Haraguchi, S., Kusaka, I., Awano, W., Kinoshita-Toyoda, A., Toyoda, H., and Goto, S. (2005). Distinct functional units of the Golgi complex in *Drosophila* cells. *Proc Natl Acad Sci U S A* *102*, 13467-13472.
- Zipursky, S.L., Venkatesh, T.R., Teplow, D.B., and Benzer, S. (1984). Neuronal development in the *Drosophila* retina: monoclonal antibodies as molecular probes. *Cell* *36*, 15-26.

### Figure legends:

**Figure S1: R1-R6 axons terminate in the lamina at both larval and adult stages (related to Figure 1).** The photoreceptor terminals in 3<sup>rd</sup> instar larval brains (A, B) and adult brains (C, D) were labeled with 24B10 (red). The R2-R5 axons at 3<sup>rd</sup> instar larval optic lobe were labeled with Ro- $\tau$ -LacZ (blue). The R1-R6 axons in the adult brains were labeled with Rh1>GFP (green). The animal genotypes for each image are (A) *y w eyFLP; Ro- $\tau$ - lacZ FRT80B cl / FRT80B iso*; (B) *y w eyFLP; Ro- $\tau$ - lacZ FRT80B cl / FRT80B 3L61*; (C) *y w eyFLP; Rh1Gal4 / UAS-sytGFP; FRT80B cl / FRT80B iso*; (D) *y w eyFLP; Rh1Gal4 / UAS-SytGFP; FRT80B cl / FRT80B 3L61*.

**Figure S2: The early differentiation of the photoreceptor cells in 3L61 mutants is intact (related to Figure 2).** (A, B) 3<sup>rd</sup> instar larvae eye imaginal discs were stained with anti-Senseless (red), anti-Elav (blue); anti-GFP (green: mutant clones are non-GFP region). The genotypes are (A) *eyFLP; FRT80B ubiGFP cl / FRT80B iso*; (B) *eyFLP; FRT80B ubiGFP cl / FRT80B 3L61*. (C, D) R7 cells in 3<sup>rd</sup> instar larval eye imaginal discs were labeled with GFP (green). 24B10 (red) labels the R cells. The animal genotypes are (C) *y w eyFLP; 181 Gal4 / UAS-SytGFP; FRT80B cl / FRT80B iso*; (D) *y w eyFLP; 181Gal4 / UAS-SytGFP ; FRT80B cl / FRT80B 3L61*. (E, F) R4 cells in 3<sup>rd</sup> instar larvae eye imaginal discs were labeled with GFP (green). The animal genotypes are (E) *y w eyFLP; m  $\Delta$ Gal4 UASGFP / +; FRT80B cl / FRT80B iso*; (F) *y w eyFLP; m  $\Delta$ Gal4 UASGFP / +; FRT80B cl / FRT80B 3L61*. (G, H) The retina thick sections of (G) control animal (*y w eyFLP; FRT80B cl / FRT80B iso*) and (H) 3L61 mutants (*y w eyFLP; FRT80B cl / FRT80B 3L61*).

**Figure S3: The expression pattern of Rich substantially overlaps with that of CadN in the optic lobe (related to Figure 4).** Optic lobes of a *rich*<sup>1</sup> mutant animal carry a HA-Rich-gRE rescue construct (rescue animal: *y w; HA-Rich-gRE::VK37; FRT80B rich*<sup>1</sup>) at the 3<sup>rd</sup> instar larval stage (A) or 50h APF (B) were stained with anti-HA (red) and anti-CadN (blue) antibodies. Rich protein is enriched in the lamina (LA) plexus and medulla (ME) where CadN is expressed. (C-E) Rab6 is broadly distributed in the developing eyes.

Eye discs (50hrs APF) (E) or optic lobes of 3<sup>rd</sup> instars (C) or 50hrs APF (D) animals (*y w*; *Act-Gal4 / UAS-Rab6YFP*) were stained with anti-GFP (red) and anti-Hrp (green) antibodies. Rab6 YFP is present in both cell body and neuropil.

**Figure S4: The R7 cells target to the correct layer in *rich<sup>1</sup>* mutant clones generated by *GMRFLP* (related to Figure 5).** The mutant R7 cells were labeled with GFP (green). The PR cell terminals are labeled with 24B10 (red). (A', B') are enlarged image for (A, B). The animal genotypes are (A, A') *y w GMRFLP; GMR-Gal4 / UAS-SytGFP; tub-Gal80 M(3)FRT80B cl / FRT80B iso*. (B, B') *y w GMRFLP; GMR-Gal4 / UAS-SytGFP; tub-Gal80 M(3)FRT80B cl / FRT80B rich<sup>1</sup>*.

**Figure S5: Rich does not exhibit Rab6 GEF activity (related to Figure 7).** (A) *Drosophila* Rab6 (dRab6) was purified from *E.coli* and loaded with BODIPY-GDP followed by incubating with the cell lysates containing overexpressed Rich, Rich+CG1116-PB, or Rich+yRgp1. The bound BODIPY-GDP percentage was determined by the BODIPY fluorescence intensity at 2 mins intervals divided by the BODIPY fluorescence intensity at 0 min. Rac1 and Tiam were used as a positive control for the GEF assay. The lysates of cells without transfection were used as negative control. (B) Rich does not interact with Rgp1p-like protein CG1116-PB or yeast Rgp1p. V5-tagged Rich or yRic1p was expressed in S2 cells alone or together with either HA-tagged CG1116-PB or HA-tagged Rgp1p. IP yRic1p could pull down yRgp1p. However, IP Rich could not detect any co-precipitation of either CG1116-PB or yRgp1p. The expression of Rgp1p and CG1116-PB was detected by blotting the whole cell lysate with anti-HA antibody. (\*) is a possible dimer of the yRic1p protein.

**Figure S6: Distribution of the cell surface proteins DLAR, Jeb, PTP69D, and endosomal protein Sec15 in the lamina of *rich<sup>1</sup>* or *Rab6* mutants at 24APF are not altered (Related to Figure 8).** (A) The animal genotypes are (control) *y w eyFLP; Act>Gal4 UAS-SytGFP / UAS-SytGFP; FRT80B iso / FRT80B tub-Gal80, M (3)*; (*rich<sup>1</sup>*):. *y w eyFLP; Act>Gal4 UAS-SytGFP / UAS-SytGFP; FRT80B rich<sup>1</sup> / FRT80B tub-Gal80, M (3)*; (*Rab6*): *y w eyFLP; FRT40A tub-Gal80 / FRT40A Rab6<sup>D23D</sup>; tubGal4/*



*UAS-SytGFP*. The side view of the lamina was shown. GFP marks the mutant cells. (B) Removal of one copy of *DLAR*, *liprin α*, or *Jeb* does not enhance the R7 targeting phenotype of *rich<sup>2</sup>*. The adult brains of the indicated genotypes were stained with 24B10 antibody (red). The genotypes are (*eyFLP; rich<sup>1</sup>*): *y w eyFLP; FRT80B rich<sup>1</sup> / FRT80B cl UbiGFP*; (*eyFLP; rich<sup>2</sup>*): *y w eyFLP; FRT80B rich<sup>2</sup> / FRT80B cl UbiGFP*; (*eyFLP; Lar / +; rich<sup>1</sup>*): *y w eyFLP; FRT40A LAR +; FRT80B rich<sup>1</sup> / FRT80B cl UbiGFP*; (*eyFLP; Lar / +; rich<sup>2</sup>*): *y w eyFLP; FRT40A LAR / +; FRT80B rich<sup>2</sup> / FRT80B cl UbiGFP*; (*eyFLP; Liprin-α<sup>e</sup> / +; rich<sup>1</sup>*): *y w eyFLP; FRT40A Liprin-α<sup>e</sup> / +; FRT80B rich<sup>1</sup> / FRT80B cl UbiGFP*; (*eyFLP; Liprin-α<sup>e</sup> / +; rich<sup>2</sup>*): *y w eyFLP; FRT40A Liprin-α<sup>e</sup> / +; FRT80B rich<sup>2</sup> / FRT80B cl UbiGFP*; (*eyFLP; Jeb / +; rich<sup>1</sup>*): *y w eyFLP; FRT40A Jeb / +; FRT80B rich<sup>1</sup> / FRT80B cl UbiGFP*; (*eyFLP; Jeb / +; rich<sup>2</sup>*): *y w eyFLP; FRT40A Jeb / +; FRT80B rich<sup>2</sup> / FRT80B cl UbiGFP*. (C) The quantification of mistargeted R7 cells (mean ± SD). *eyFLP; rich<sup>1</sup>*: (18.9 ± 3.4 %, n=450) ; *eyFLP; rich<sup>2</sup>*: (8.15 ± 1.5%, n=517) ; *eyFLP; Lar / +; rich<sup>1</sup>*: (19.7 ± 2.4%, n=656) ; *eyFLP; Lar / +; rich<sup>2</sup>*: (7.3 ± 1.5%, n=438); *eyFLP; Liprin-α<sup>e</sup> / +; rich<sup>1</sup>*: (17.7 ± 2.1%, n=362); *eyFLP; Liprin-α<sup>e</sup> / +; rich<sup>2</sup>*: (8.6 ± 1.9%, n=345); *eyFLP; Jeb / +; rich<sup>1</sup>*: ( 18.5± 2.2%, n=514); *eyFLP; Jeb / +; rich<sup>2</sup>*: (8.9 ± 1.5%, n=363).

**Figure S7: CadN has a normal distribution in medulla of both *rich<sup>1</sup>* and *Rab6* mutants. (Related to Figure 8).** Adult brains were stained with anti-CadN (red) and 24B10 (green) antibody. The animal genotypes are CTL (*y w eyFLP; FRT80B iso / FRT80B cl UbiGFP*); *rich<sup>1</sup>* (*y w eyFLP; FRT80B rich<sup>1</sup> / FRT80B cl UbiGFP*); *Rab6* (*y w eyFLP; FRT40A Rab6 / FRT40A cl*); *CadN (PR)* (*y w GMRFLP; FRT40A CadN<sup>A14</sup> / FRT40A cl*). (B) The CadN RNA level in *rich* mutant does not change when assessed with the real-time PCR assay. Relative levels of CadN mRNAs were calculated using Rotor-Gene 6.0 software and normalized to the levels of endogenous tubulin in the same samples. The relative transcript level of the control was set as 1. The relative transcript levels of other samples were compared to the control, and the fold-changes shown in the graph. The animal genotypes are CTL: (*y w eyFLP; FRT80B iso / FRT80B cl UbiGFP*) ; *CadN*: (*y w eyFLP; FRT40A CadN<sup>M19</sup> / FRT40A cl*); *rich<sup>1</sup>* (*y w eyFLP; FRT80B rich<sup>1</sup> / FRT80B cl UbiGFP*).

**Figure S8: Rich, Rab6, and CadN function in a common pathway, but overexpression CadN cannot rescue *rich* targeting phenotypes (related to Figure 8).**

(A). Axon terminals of Or46a, OR47b ORNs in *rich*, *Rab6*, and *CadN* mutants fail to converge on their appropriate glomeruli and spread out over the surface of the antenna lobe. Or22a ORN axon terminals in *CadN* mutants spread out over the surface of the lobe, but there is no obvious defect in both *rich* and *Rab6* mutants. Different ORN classes (Or46a, Or47b, Or22a) are shown in wild type (*y w eyFLP; UAS-SytGFP / OrGal4; FRT80B iso / FRT80B tub-Gal80, M(3)*), *rich* mutant (*y w eyFLP; UAS-SytGFP / OrGal4; FRT80B rich<sup>1</sup> / FRT80B tub-Gal80, M(3)*), *Rab6* mutants (*y w eyFLP; FRT40A Rab6<sup>D23D</sup> / FRT40A tub-Gal80; UAS-SytGFP / OrGal4*), and *CadN* mutants (*y w eyFLP; FRT40A CadN<sup>M19</sup> FRT40A tub-Gal80; OrGal4>UAS-SytGFP*). The glomeruli are labeled with anti-nc82 (red). The ORN axons are labeled with anti-GFP antibody (green). (B) The adult brains of the animals with indicated genotypes were stained with anti-GFP (green), 24B10 (red), and anti-CadN (blue) antibody. The mutant cells were marked with GFP and the targeting patterns of photoreceptor cells were shown by 24B10 staining. (C) Quantification of mistargeted R7 cells in the animals with indicated genotypes. The mistargeted R7 terminals were counted and divided by the total number of R7 cells in the same image. CTL (*y w eyFLP; Act>Gal4 UAS-SytGFP / UAS-SytGFP; FRT80B M (3), tub-Gal80 / FRT80B iso*) ; *rich<sup>1</sup>* (*y w eyFLP; Act>Gal4 UAS-SytGFP / UAS-SytGFP; FRT80B M (3), tub-Gal80 / FRT80B rich<sup>1</sup>*) (20.24±2% (n=252)); *rich<sup>1</sup>*, Act CadN (*y w eyFLP; Act>Gal4 UAS-SytGFP / UAS-CadN; FRT80B M (3), tubGal80 / FRT 80B rich<sup>1</sup>*)( 20.12 ±2% (n= 348)).

Figure S1

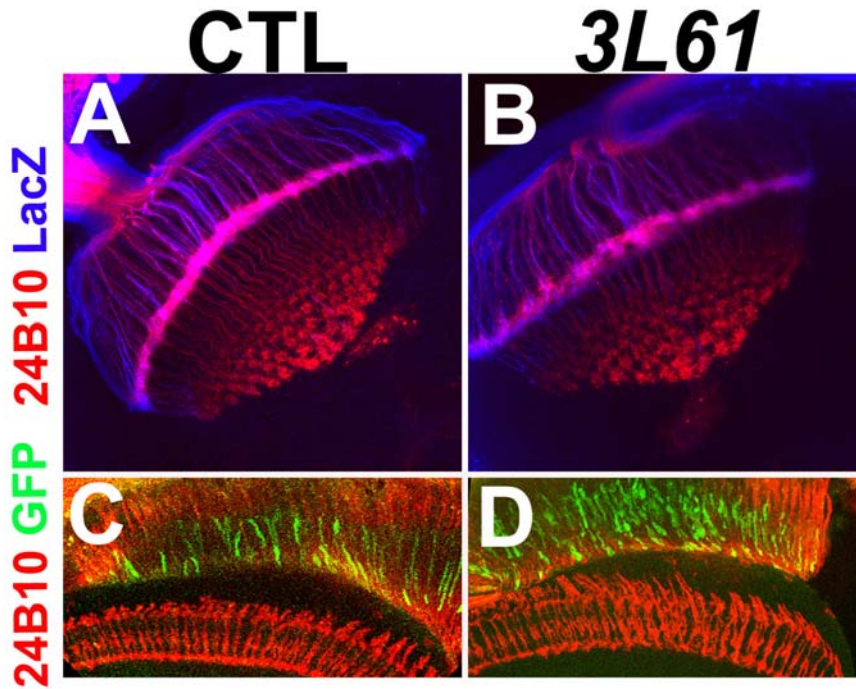

Figure S2

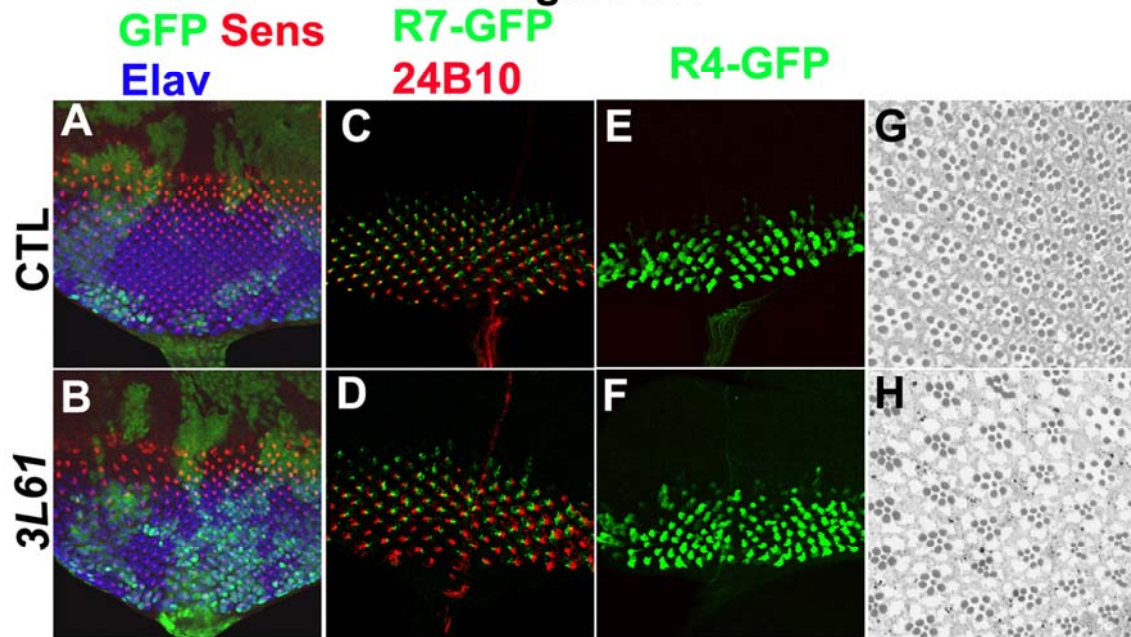

Figure S3

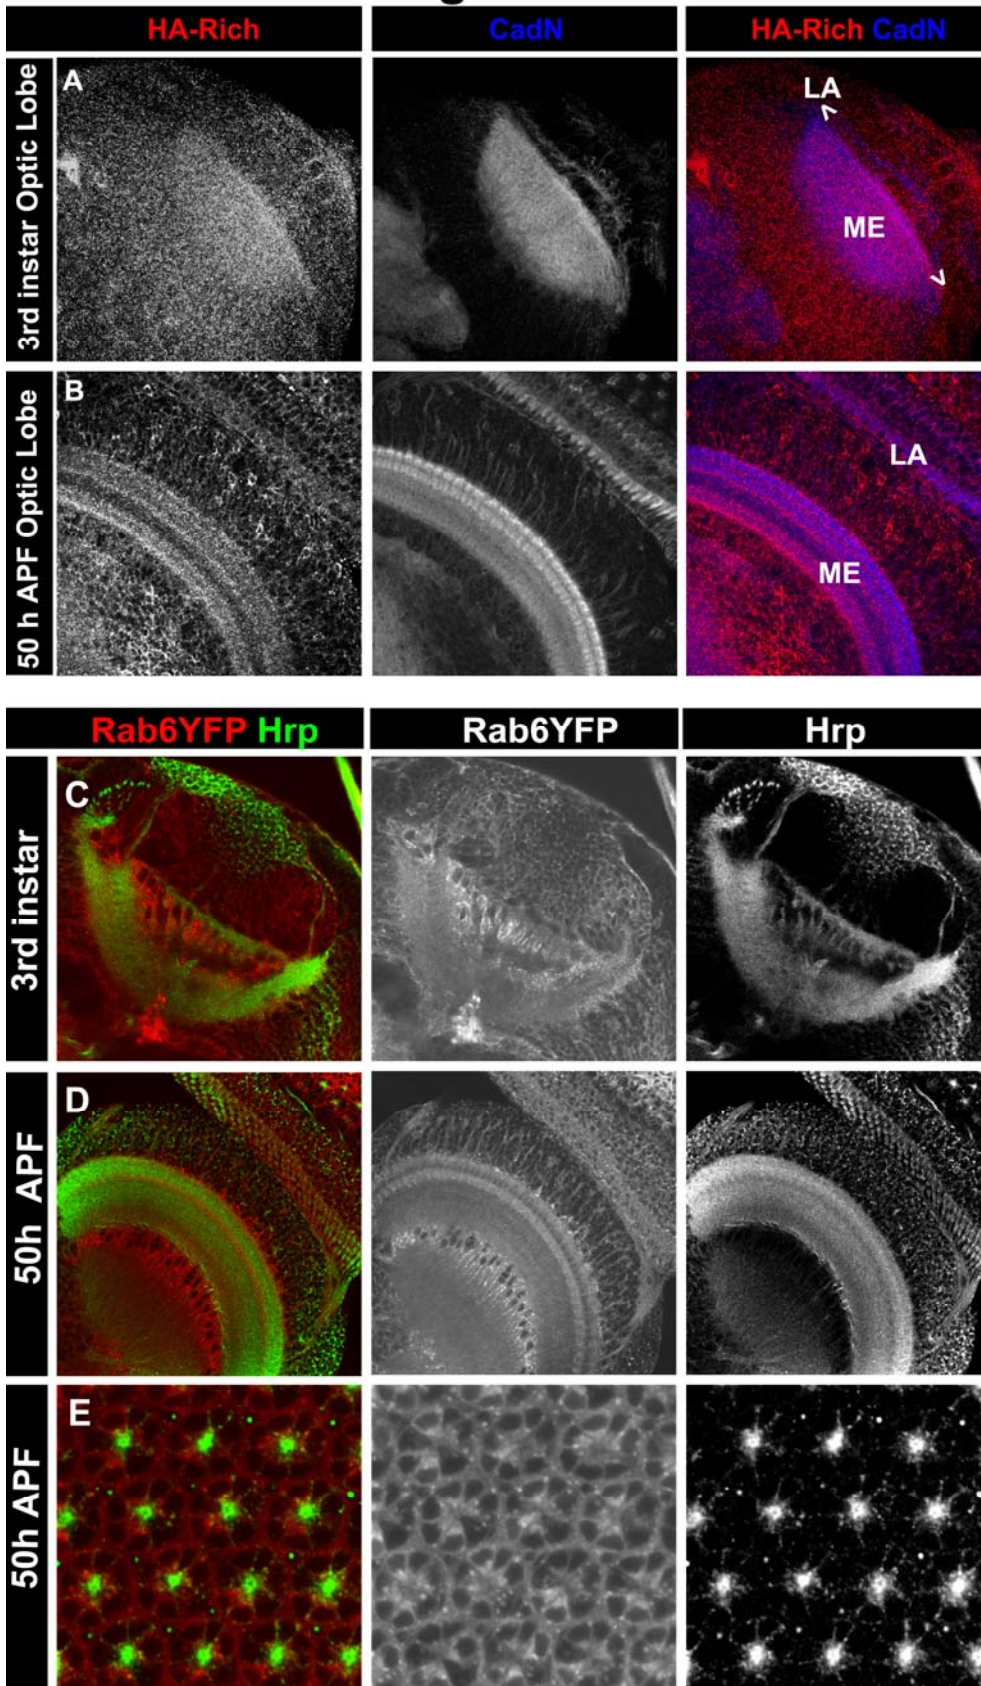



## Figure S4

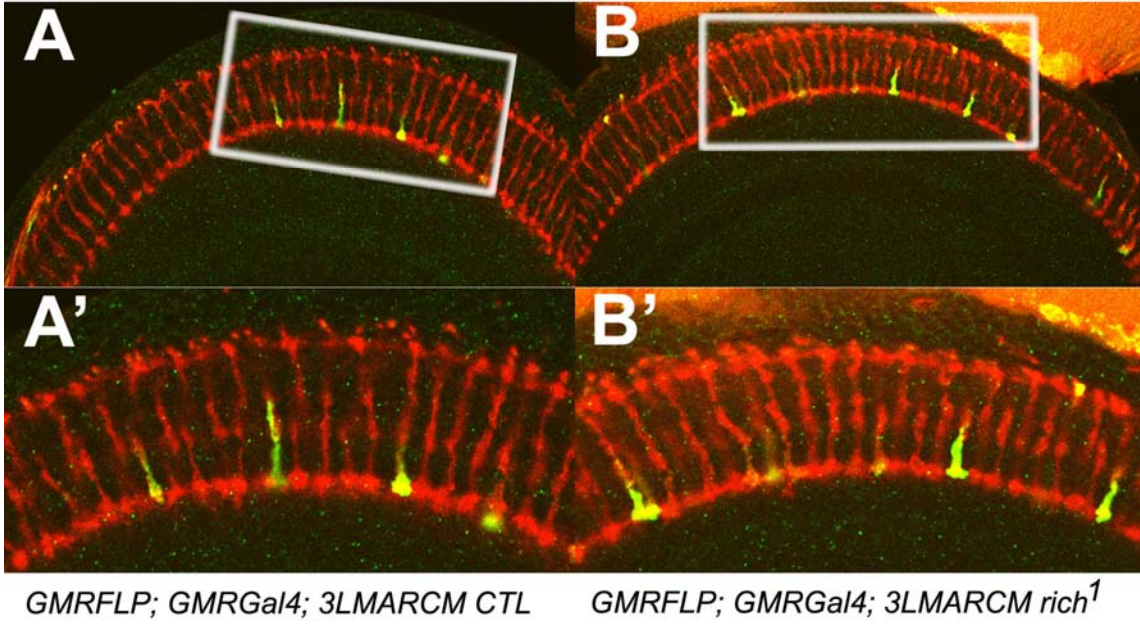

## Figure S5

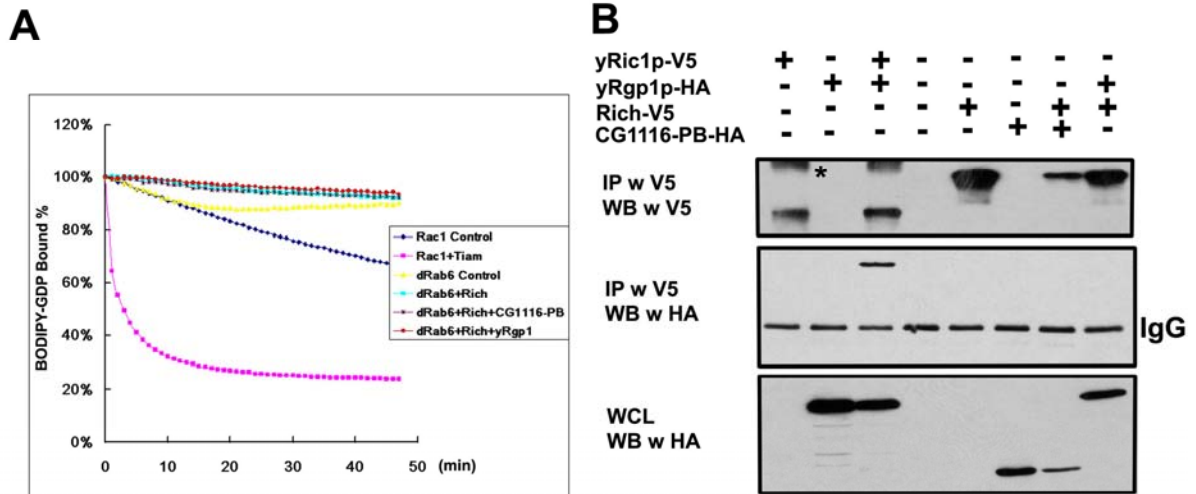

Figure S6

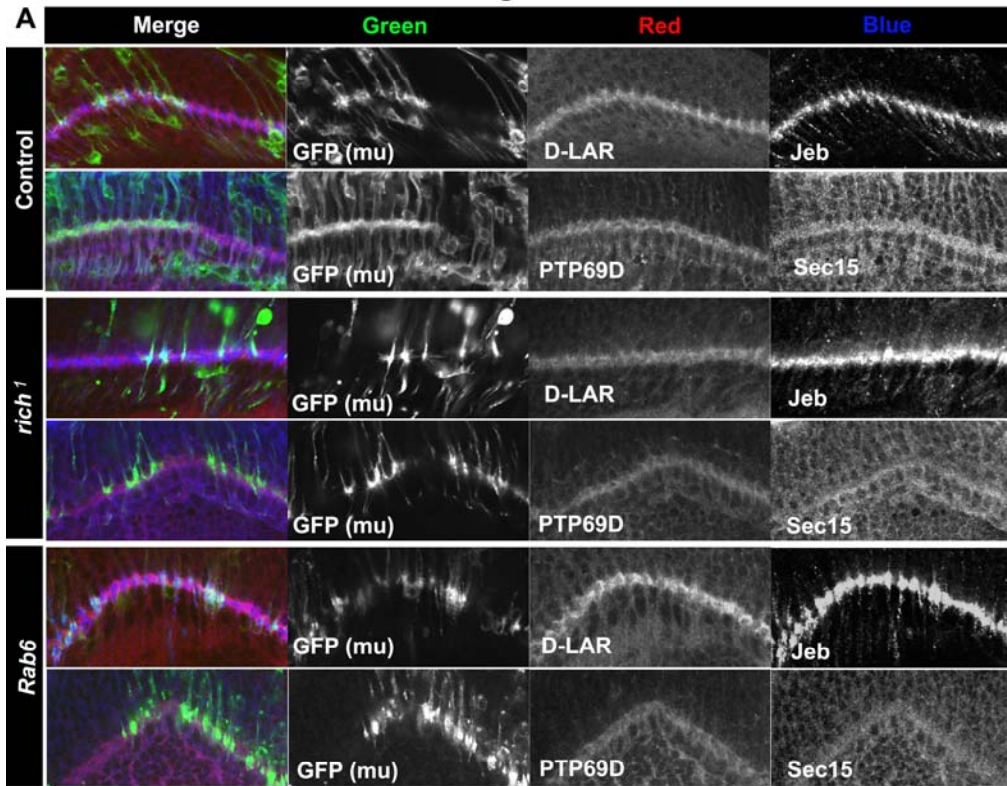

**B**

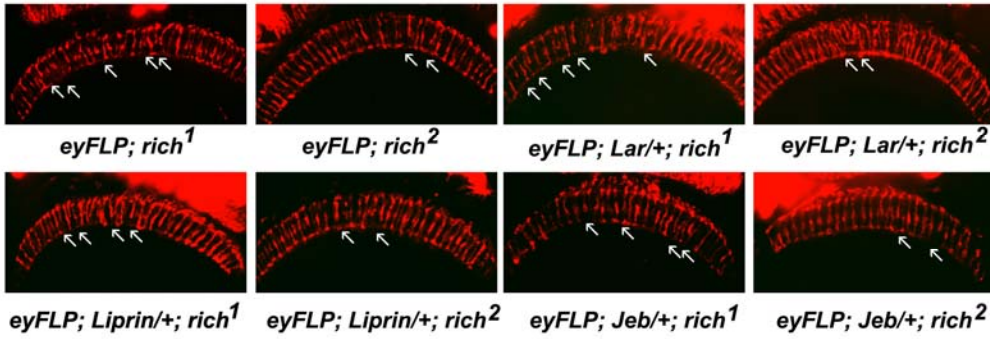

**C**

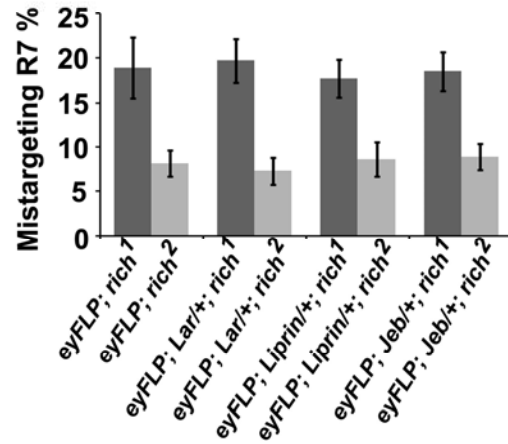

Figure S7

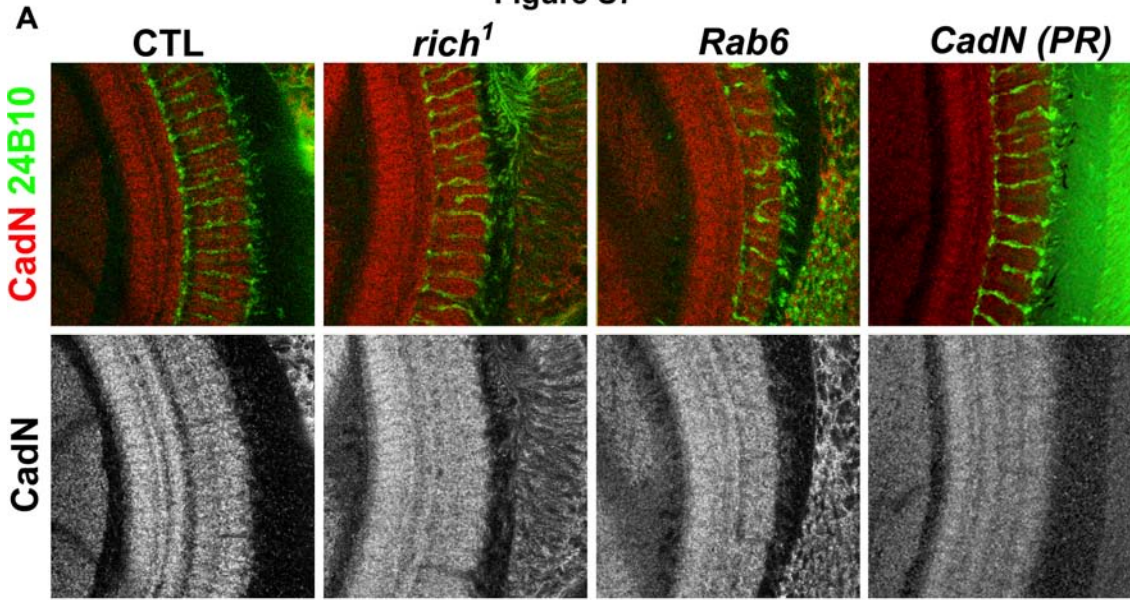

**B**

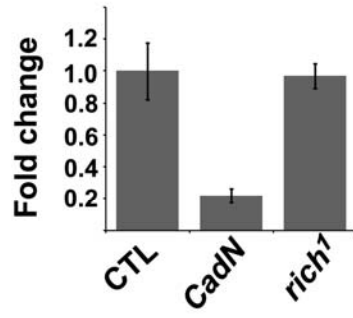



Figure S8

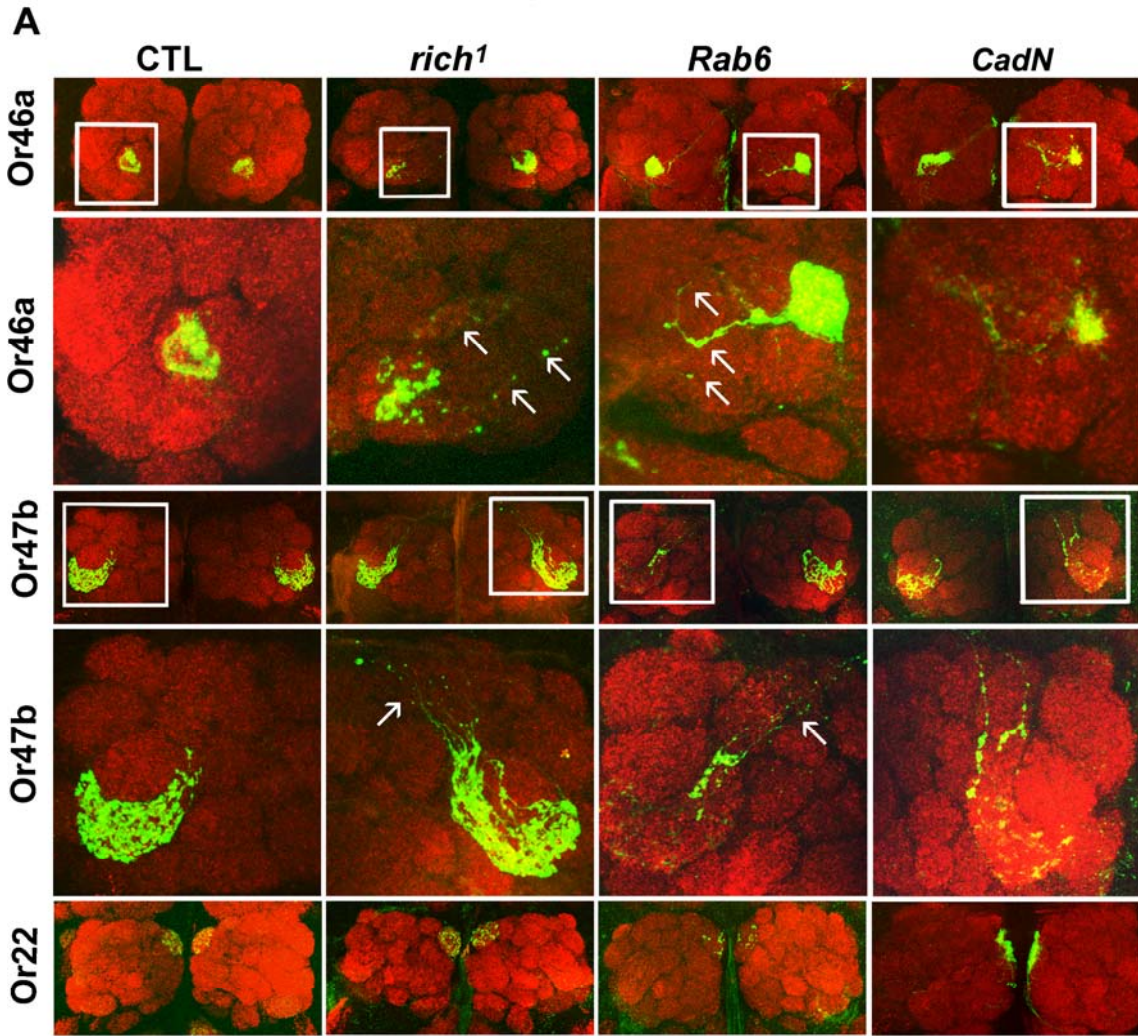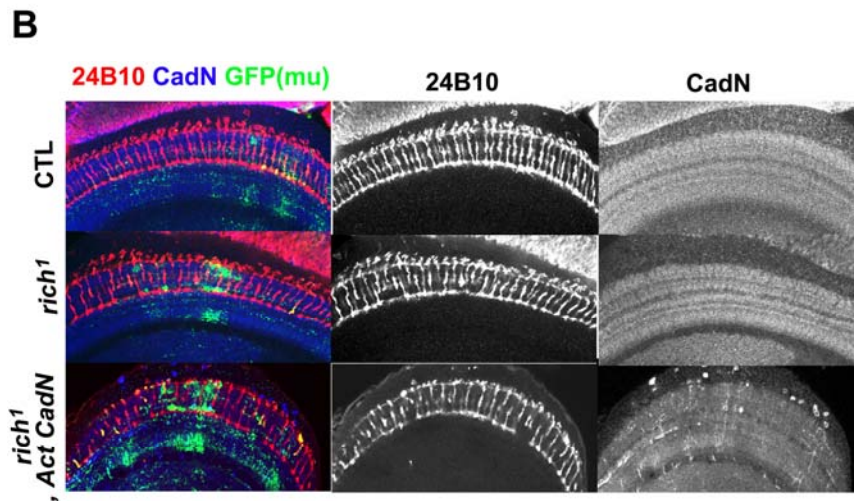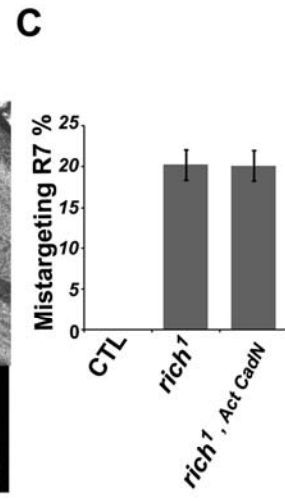

Supplement: NIHMS319184-supplement-01.pdf [file NIHMS319184-supplement-01.pdf]
